# Supplementary material for: AGEMAP: A Gene Expression Database for Aging in Mice
Source: PLoS Genet. 2007 Nov 30;3(11):e201. doi: 10.1371/journal.pgen.0030201 (PMC2098796; doi:10.1371/journal.pgen.0030201)
Supplement: Table S4 — (27 KB XLS) [file pgen.0030201.st004.xls]

## Sheet: Sheet1
Supplemental Table 4: Gene sets age-regulated to p < 0.001 in individual mouse tissues
a Z-Value denotes the Z-score calculated by the van der Waerden nonparametric test, and reflects the number of standard deviations that a set of genes is skewed from normal within the ranked set of all genes. See Zahn et al. (2006) for a complete mathematical description.
b p-values calculated by resampling with replacement
Adrenals
GO ID	GO Name	Z-Valuea	pb <
GO:0006259	DNA metabolism	-2.90204	0.001
GO:0007218	neuropeptide signaling pathway	-2.82976	0.001
GO:0007517	muscle development	-2.33429	0.001
GO:0005249	voltage-gated potassium channel activity	2.03023	0.001
GO:0016538	cyclin-dependent protein kinase regulator activity	2.1438	0.001
GO:0015293	symporter activity	2.36	0.001
Cerebellum
GO ID	GO Name	Z-Valuea	pb <
GO:0006950	response to stress	-2.11595	0.001
GO:0004497	monooxygenase activity	-1.84515	0.001
Eye
GO ID	GO Name	Z-Valuea	pb <
GO:0005794	Golgi apparatus	-2.99205	0.001
GO:0005681	spliceosome complex	-2.89683	0.001
GO:0005201	extracellular matrix structural constituent	-2.38529	0.001
GO:0005198	structural molecule activity	-2.05116	0.001
GO:0005813	centrosome	-1.92066	0.001
GO:0005576	extracellular region	-1.85986	0.001
GO:0008201	heparin binding	-1.7506	0.001
GO:0006605	protein targeting	1.78899	0.001
GO:0006629	lipid metabolism	2.02828	0.001
GO:0006811	ion transport	2.87698	0.001
Gonads
GO ID	GO Name	Z-Valuea	pb <
GO:0005840	ribosome	-8.27434	0.001
GO:0005830	cytosolic ribosome (sensu Eukaryota)	-5.81794	0.001
GO:0015078	hydrogen ion transporter activity	-4.27823	0.001
GO:0015992	proton transport	-4.08343	0.001
GO:0006414	translational elongation	-4.07503	0.001
GO:0030334	regulation of cell migration	-2.98664	0.001
GO:0016829	lyase activity	-2.314	0.001
GO:0015288	porin activity	-1.901	0.001
GO:0009897	external side of plasma membrane	2.24007	0.001
GO:0004888	transmembrane receptor activity	2.89037	0.001
GO:0005887	integral to plasma membrane	3.02922	0.001
Heart
GO ID	GO Name	Z-Valuea	pb <
GO:0006364	rRNA processing	-3.13915	0.001
GO:0031072	heat shock protein binding	-2.63355	0.001
GO:0004888	transmembrane receptor activity	-2.26451	0.001
GO:0006897	endocytosis	-1.82759	0.001
GO:0005913	cell-cell adherens junction	-1.7098	0.001
GO:0008021	synaptic vesicle	1.72978	0.001
GO:0007281	germ cell development	1.96899	0.001
GO:0016567	protein ubiquitination	2.04878	0.001
GO:0000775	chromosome, pericentric region	2.37969	0.001
GO:0000151	ubiquitin ligase complex	2.95349	0.001
Lung
GO ID	GO Name	Z-Valuea	pb <
GO:0009953	dorsal/ventral pattern formation	-2.88238	0.001
GO:0030154	cell differentiation	-2.72389	0.001
GO:0006816	calcium ion transport	-2.43147	0.001
GO:0000793	condensed chromosome	-2.19311	0.001
GO:0006259	DNA metabolism	-2.02308	0.001
GO:0005516	calmodulin binding	-1.46667	0.001
Spleen
GO ID	GO Name	Z-Valuea	pb <
GO:0007001	chromosome organization and biogenesis (sensu Eukaryota)	-2.39901	0.001
GO:0006955	immune response	4.40957	0.001
Thymus
GO ID	GO Name	Z-Valuea	pb <
GO:0006412	protein biosynthesis	-10.7574	0.001
GO:0005200	structural constituent of cytoskeleton	-4.63882	0.001
GO:0006457	protein folding	-4.14139	0.001
GO:0004298	threonine endopeptidase activity	-4.01246	0.001
GO:0005839	proteasome core complex (sensu Eukaryota)	-4.01246	0.001
GO:0003743	translation initiation factor activity	-3.82335	0.001
GO:0004386	helicase activity	-3.39105	0.001
GO:0006397	mRNA processing	-3.32422	0.001
GO:0051082	unfolded protein binding	-3.28503	0.001
GO:0000398	nuclear mRNA splicing, via spliceosome	-3.08717	0.001
GO:0007049	cell cycle	-2.98906	0.001
GO:0005525	GTP binding	-2.92308	0.001
GO:0006886	intracellular protein transport	-2.8821	0.001
GO:0016568	chromatin modification	-2.7188	0.001
GO:0016853	isomerase activity	-2.659	0.001
GO:0042127	regulation of cell proliferation	-2.62692	0.001
GO:0007600	sensory perception	-2.46825	0.001
GO:0006413	translational initiation	-2.46675	0.001
GO:0006396	RNA processing	-2.44443	0.001
GO:0019904	protein domain specific binding	-2.24906	0.001
GO:0004527	exonuclease activity	-2.21971	0.001
GO:0005874	microtubule	-2.16109	0.001
GO:0008565	protein transporter activity	-1.9447	0.001
GO:0050875	cellular physiological process	-1.88097	0.001
GO:0006334	nucleosome assembly	-1.86219	0.001
GO:0006281	DNA repair	-1.85456	0.001
GO:0006289	nucleotide-excision repair	-1.83662	0.001
GO:0003755	peptidyl-prolyl cis-trans isomerase activity	-1.77104	0.001
GO:0005654	nucleoplasm	-1.68921	0.001
GO:0030163	protein catabolism	-1.68285	0.001
GO:0005882	intermediate filament	-1.65183	0.001
GO:0007015	actin filament organization	-1.63902	0.001
GO:0006897	endocytosis	-1.49344	0.001
GO:0007517	muscle development	-1.48106	0.001
GO:0006974	response to DNA damage stimulus	-1.43675	0.001
GO:0008104	protein localization	-1.39118	0.001
GO:0004221	ubiquitin thiolesterase activity	-1.17263	0.001
GO:0006310	DNA recombination	-1.15072	0.001
GO:0016538	cyclin-dependent protein kinase regulator activity	-1.04281	0.001
GO:0006606	protein import into nucleus	-1.00513	0.001
GO:0008203	cholesterol metabolism	1.09913	0.001
GO:0001764	neuron migration	1.15725	0.001
GO:0006694	steroid biosynthesis	1.25206	0.001
GO:0015293	symporter activity	1.6013	0.001
GO:0001584	rhodopsin-like receptor activity	1.737	0.001
GO:0006139	nucleobase, nucleoside, nucleotide and nucleic acid metabolism	1.76233	0.001
GO:0005386	carrier activity	1.86961	0.001
GO:0000776	kinetochore	2.13911	0.001
GO:0007268	synaptic transmission	2.6099	0.001
GO:0004871	signal transducer activity	2.74714	0.001
GO:0016702	oxidoreductase activity, acting on single donors with incorporation of molecular oxygen, incorporation of two atoms of oxygen	2.79152	0.001
